# Supplementary material for: Formation of hollow porous TiO2 nanospheres via the encapsulation of CO2 nanobubbles for high-performance adsorption and photocatalysis
Source: Royal Society of Chemistry journal article supplement (doi:10.1039/d0dt01228a), 2020-01-01
Supplement: d0dt01228a1.pdf [file d0dt01228a1.pdf]

*Electronic Supplementary Information*

**Formation of Hollow Porous TiO<sub>2</sub> Nanospheres via  
Encapsulation of CO<sub>2</sub> Nanobubbles for High-Performance  
of Adsorption and Photocatalysis**

*H. K. Lee,<sup>\*a,b</sup> and S. W. Lee<sup>\*a,c</sup>*

*a Graduate School of Environmental Engineering, The University of Kitakyushu, 1-1 Hibikino,  
Wakamatsu, Kitakyushu 808-0135, Japan*

*b Clean Fuel Research Laboratory, Korea Institute of Energy Research, Daejeon, 34129, Korea*

*c EnH Japan Co. Ltd., 3-3-2 Honjogakendai, Yahatanishi, Kitakyushu 807-0807, Japan*

*\* E-mail address: leehk@kier.re.kr (H.K. Lee), leesw@kitakyu-u.ac.jp (S.W. Lee).*

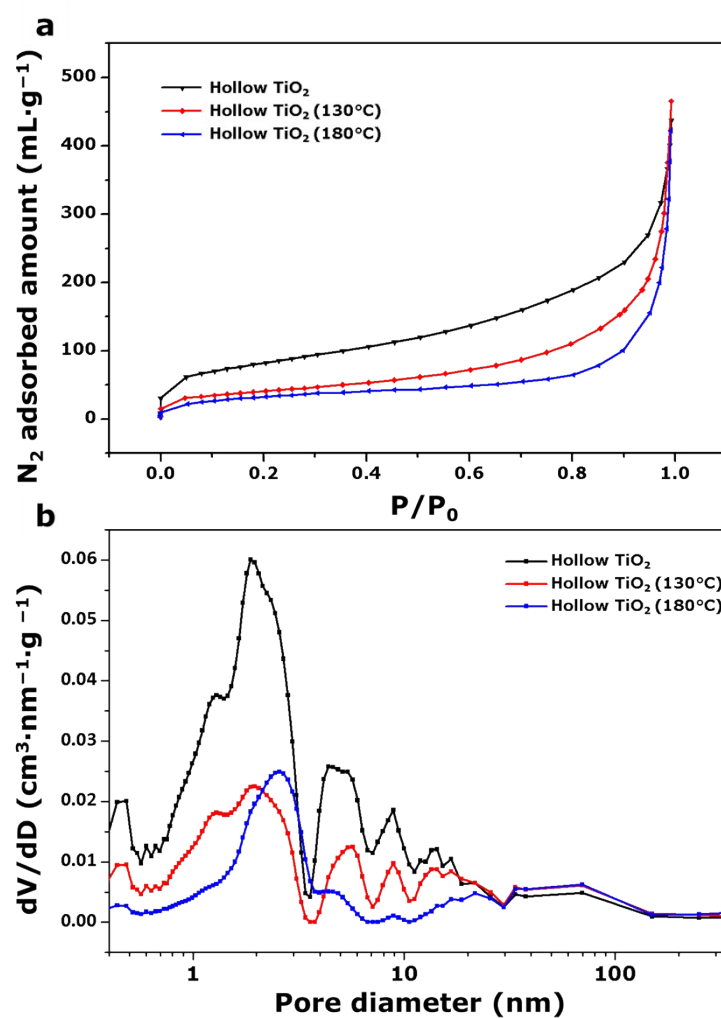

**Fig. S1.** (a) Nitrogen adsorption isotherms and pore size distribution of hollow porous  $\text{TiO}_2$  nanospheres prepared at  $90^\circ\text{C}$  and additional hydrothermally treated sample at  $130^\circ\text{C}$  and  $180^\circ\text{C}$ .

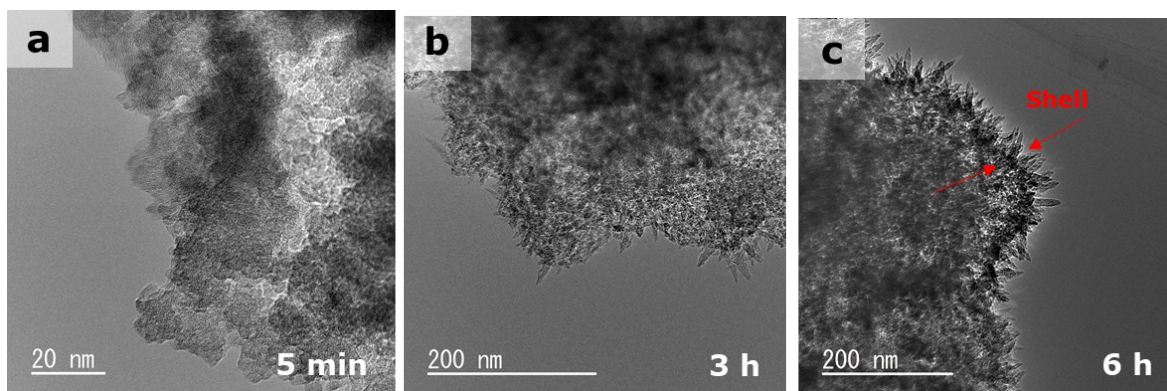

**Fig. S2.** TEM images of  $\text{TiO}_2$  samples obtained according to the reaction time by mixing  $[\text{NH}_4]_2\text{TiF}_6$  and  $\text{NaHCO}_3$  solution at  $90^\circ\text{C}$ .

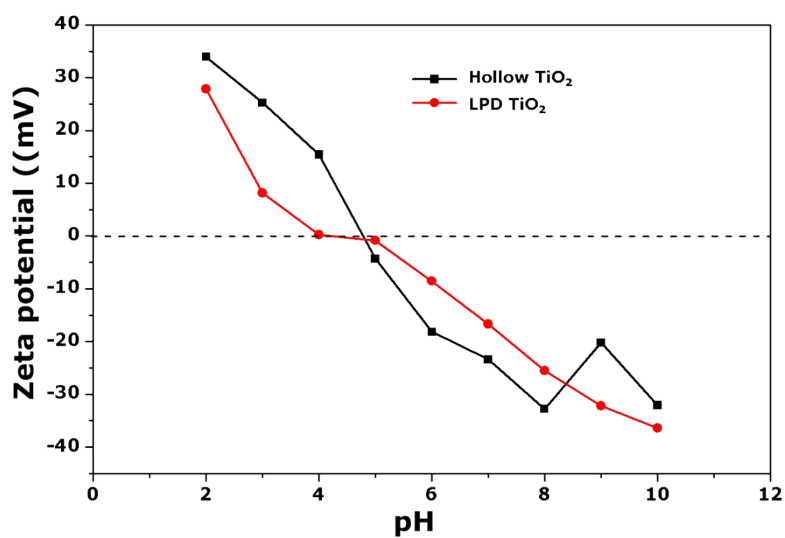

**Fig. S3.** pH dependence of the zeta potential of hollow porous  $\text{TiO}_2$  nanospheres and conventional LPD  $\text{TiO}_2$  nanoparticles.

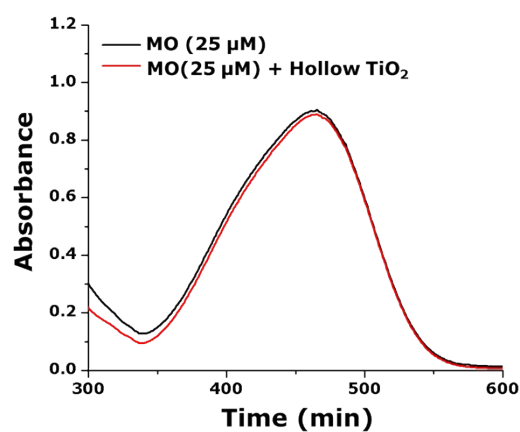

**Fig. S4.** UV-vis absorption spectra of 25 μM MO solutions in the presence of hollow porous TiO<sub>2</sub> nanospheres.

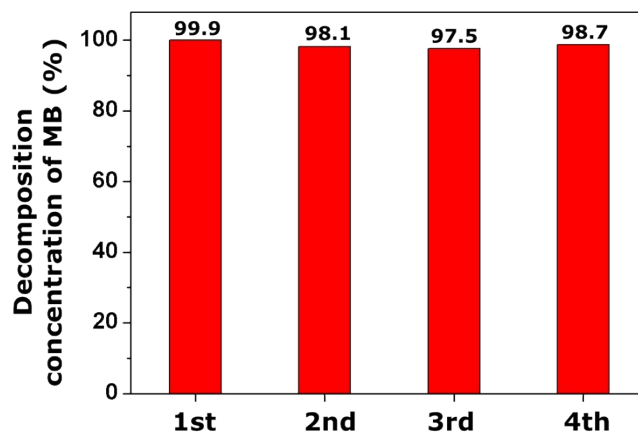

**Fig. S5.** Photocatalytic degradation of MB with hollow porous TiO<sub>2</sub> treated at 180°C in different recycling time. The reaction were conducted for 60 min.

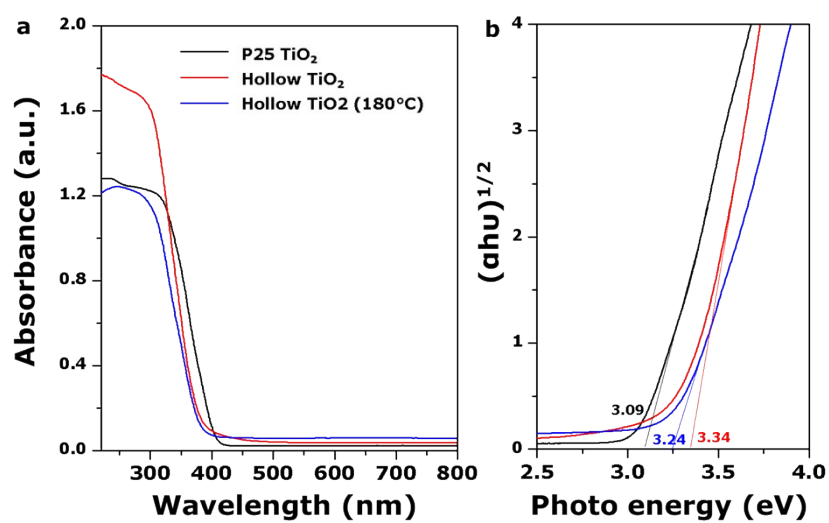

**Fig. S6.** (a) Comparative UV-visible diffuse absorbance spectra and (b) plots of  $(\alpha h\nu)^{1/2}$  vs. the energy of absorbed light of commercial P25 TiO<sub>2</sub> nanoparticles, and pristine and hydrothermally treated (180°C) hollow porous TiO<sub>2</sub> nanospheres
